# Supplementary material for: Analysis of Active Compounds Using Target Protein Cofilin―Cucurbitacins in Cytotoxic Plant Bryonia cretica
Source: MDPI journal article supplement (doi:10.3390/toxins14030212), 2022-03-16
Supplement: s1 [file s1]

Communication

# Analysis of Active Compounds Using Target Protein Cofilin—Cucurbitacins in Cytotoxic Plant *Bryonia cretica*

Souichi Nakashima, Yoshimi Oda, Moeko Morita, Ayako Ohta, Toshio Morikawa, Hisashi Matsuda and Seikou Nakamura

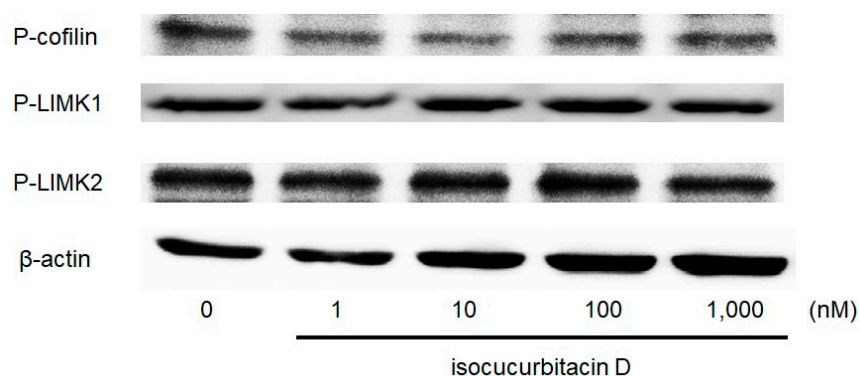

**Figure S1.** Effects of isocucurbitacin D on p-cofilin/β-actin, p-LIMK1/β-actin, and p-LIMK2/β-actin levels.
